# Supplementary material for: Common bean (Phaseolus vulgaris L.) PvTIFY orchestrates global changes in transcript profile response to jasmonate and phosphorus deficiency
Source: PubMed Central journal article supplement (PMC3621168; doi:10.1186/1471-2229-13-26), 2013-02-13

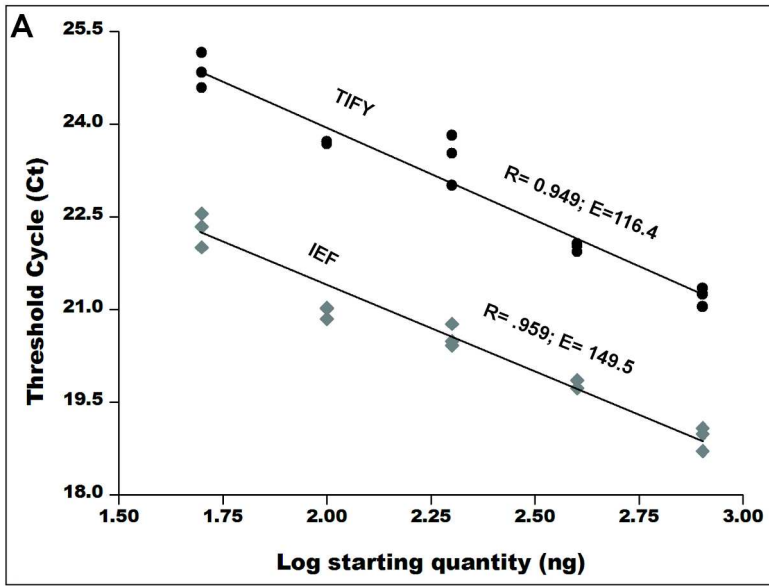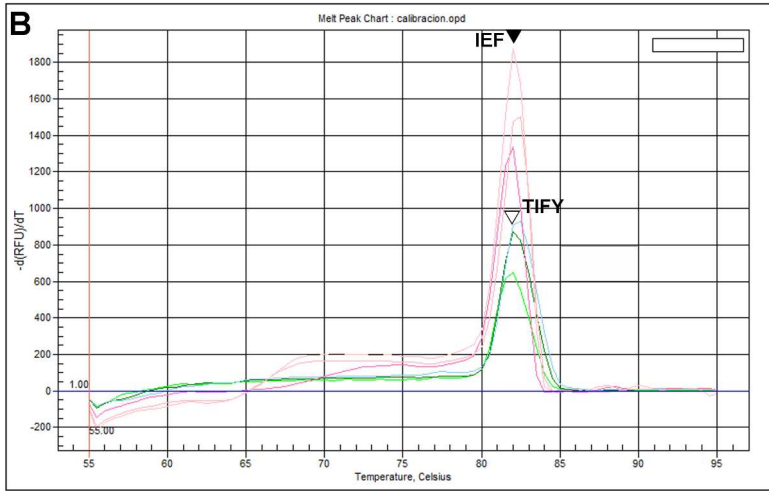

Supplement: 1471-2229-13-26-S3.pdf [file 1471-2229-13-26-S3.pdf]
